# Supplementary material
Source: PubMed Central journal article supplement (PMC3444271)
Supplement: supp_ers209_00078923_file001.pdf [file supp_ers209_00078923_file001.pdf]

**Supplementary figure legends.**

**Supplemental Figure 1. Mucilage production is intact in *flp-7* and *flp-1; myb88* seeds.**

Micrographs of ruthenium red stained seeds. (A) *L. er.* (B) *flp-7*. (C) Col-0. (D) *flp-1; myb 88*.

**Supplemental Figure 2. Pollen tube growth is normal in *flp-7* pistils.** Micrographs of pollen tubes stained with aniline blue 24 hours after pollination. (A) *L. er.* (B) *flp-7*.

**Supplemental Figure 3. Abnormal *flp-7* ovules do not differentiate central cells.** (A, B)

Micrographs of FG7 ovules. (A) *AGL61::GFP* in *L. er* background. (B) *AGL61::GFP* in *flp-7* background. (C) Quantification of expression. 85% of ovules (n=329) in the *L. er* background showed *AGL61::GFP* expression while only 55% of ovules (n=257) in the *flp-7* background did.

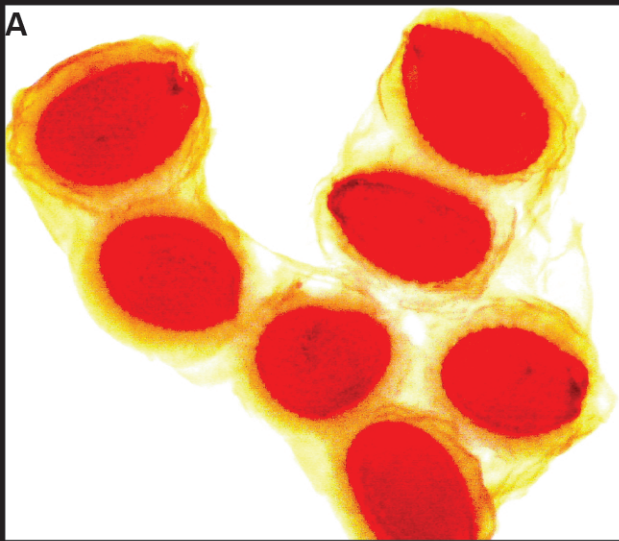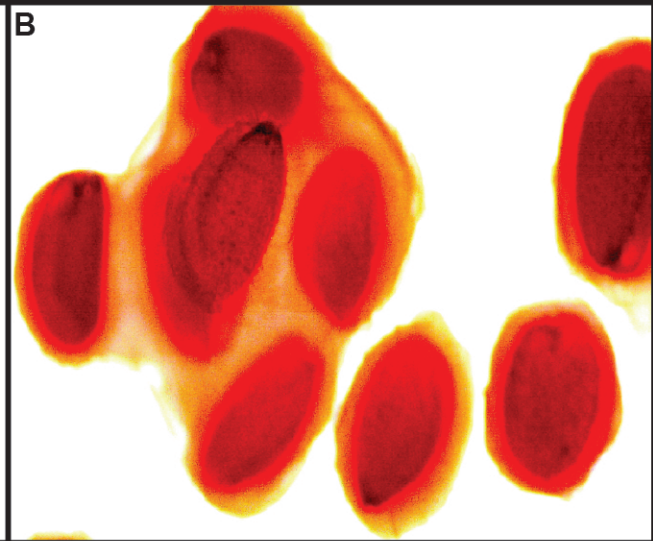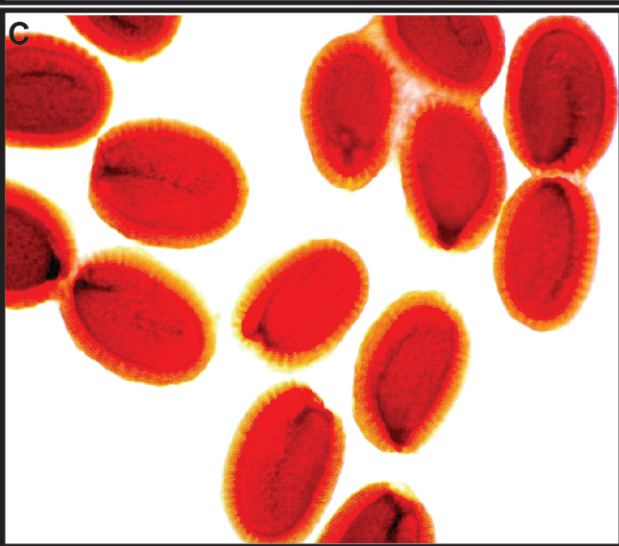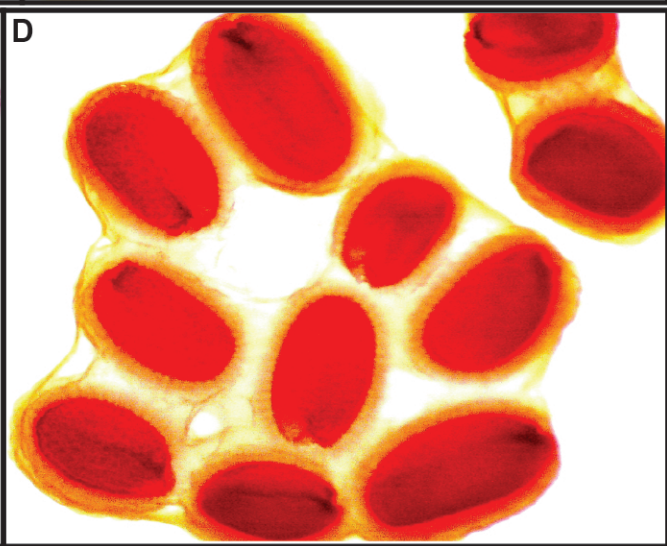

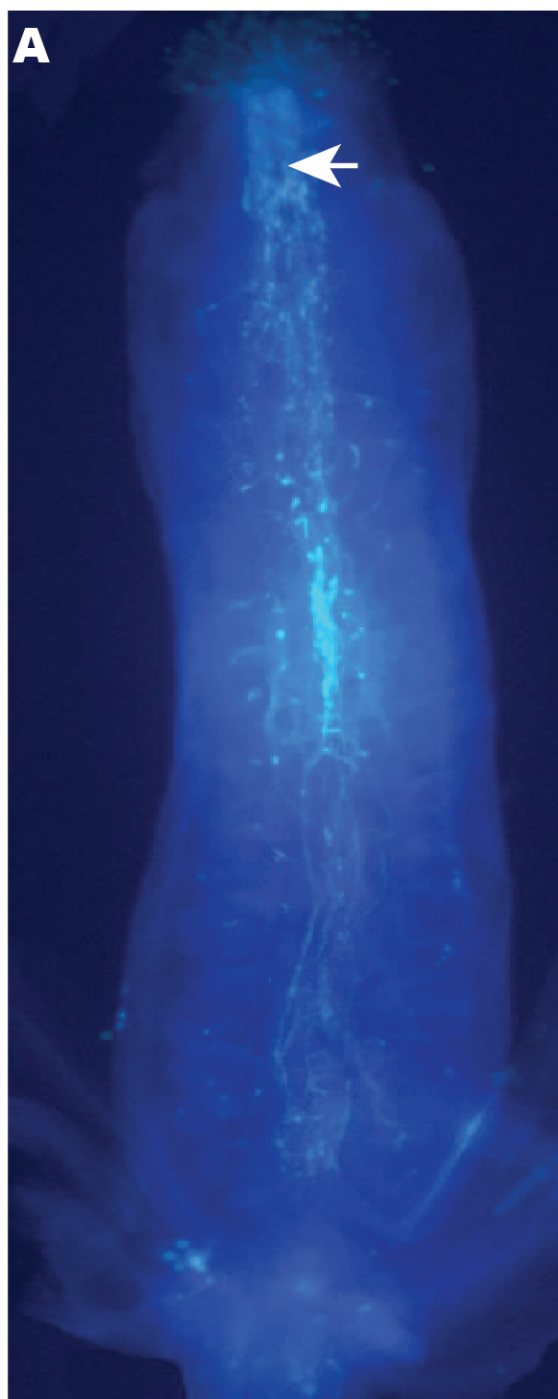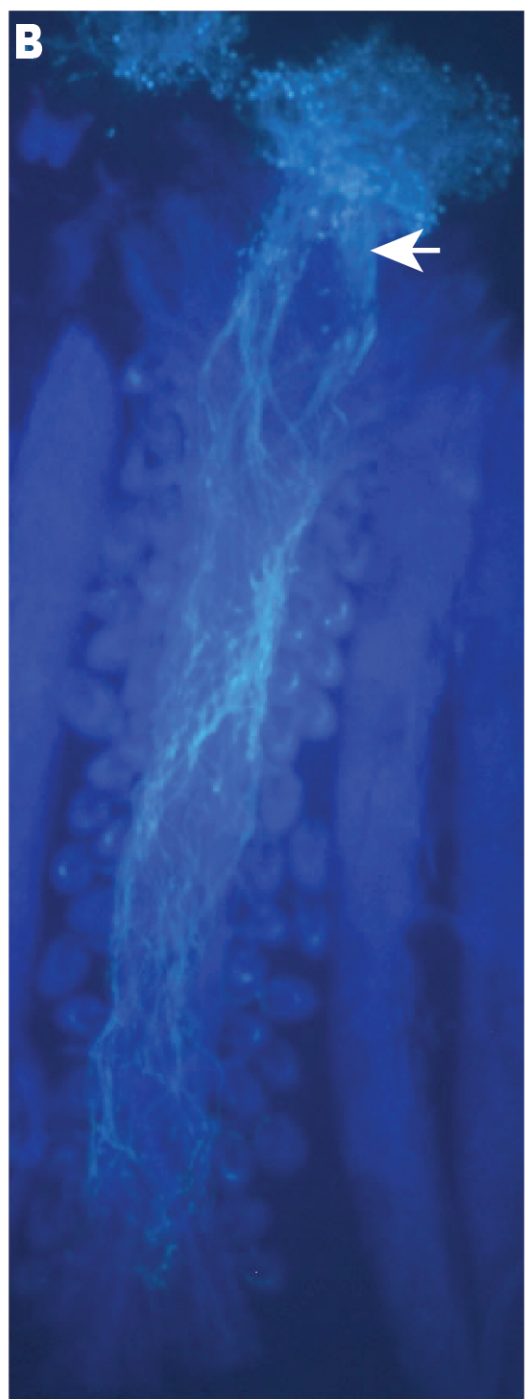

**A**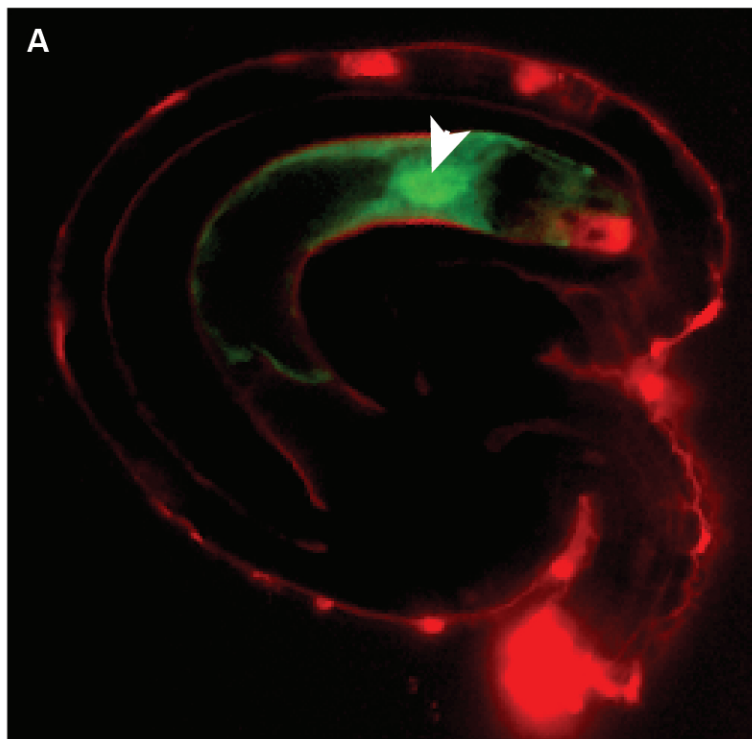**B**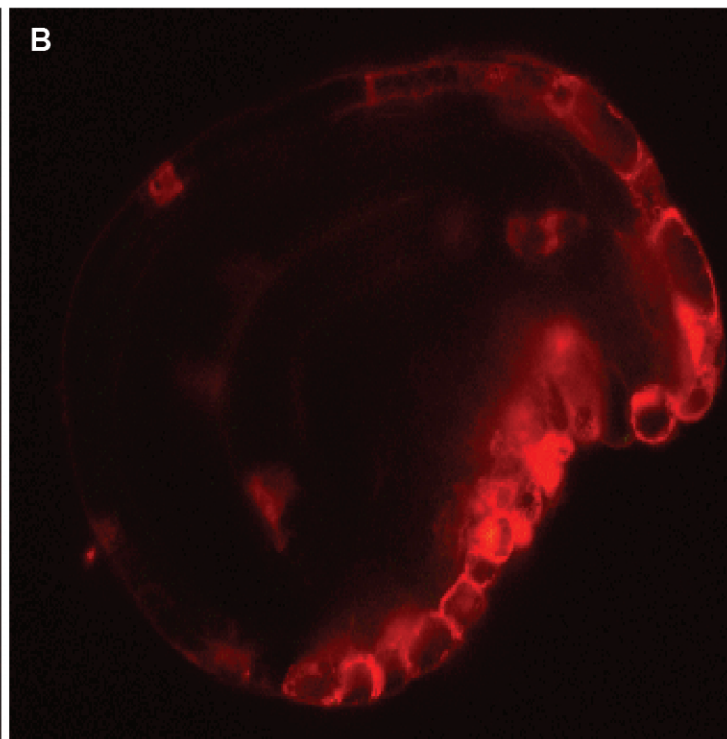**C**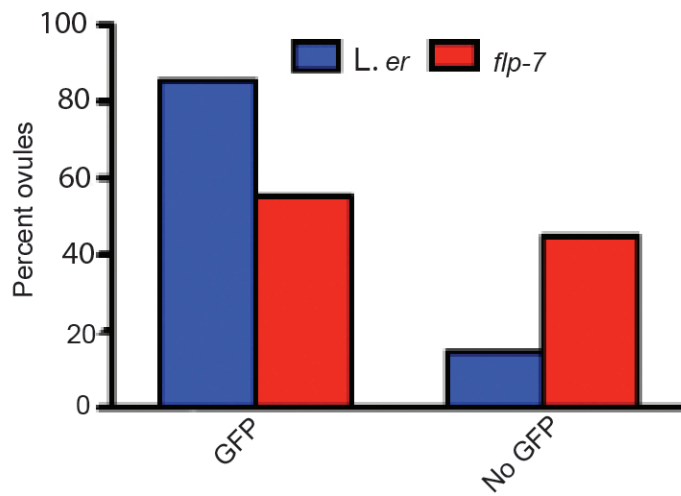



**Supplemental Table 1.** Primer combinations used for genotyping.

| <b>Allele or construct</b>       | <b>To amplify wild type allele (or construct)</b> | <b>Length of product (bp)</b> | <b>To amplify mutant allele</b> | <b>Length of product (bp)</b> | <b>Restriction enzyme used (if dCAPs)</b> |
|----------------------------------|---------------------------------------------------|-------------------------------|---------------------------------|-------------------------------|-------------------------------------------|
| <i>flp-1</i>                     | FLP-1DCAPSF<br>FLP-1DCAPSR                        | 162                           | FLP-1DCAPSF<br>FLP-1DCAPSR      | 162                           | PvuII <sup>a</sup>                        |
| <i>flp-7</i>                     | FLP-7DCAPSF<br>FLP-7DCAPSR                        | 125                           | FLP-7DCAPSF<br>FLP-7DCAPSR      | 125                           | DdeI <sup>a</sup>                         |
| <i>myb88</i>                     | MYB88-3F<br>MYB88-10R                             | 1200                          | LBa1<br>MYB88-10R               | 600                           | NA <sup>b</sup>                           |
| <i>er</i> ( <i>L. er</i> allele) | erdCAPSF<br>erdCAPSR                              | 105                           | erdCAPSF<br>erdCAPSR            | 105                           | EcoRV <sup>a</sup>                        |

<sup>a</sup>Cuts wild type allele; <sup>b</sup>NA, not applicable.

**Supplemental Table 2.** Primers used in this study.

| Primer name | Use                                      | Sequence (5' to 3')                                        | Reference                                                                                         |
|-------------|------------------------------------------|------------------------------------------------------------|---------------------------------------------------------------------------------------------------|
| FLP-1DCAPSF | <i>flp-1</i> dCAPs                       | CAAAGACAAAAGCACAAGACAATGC                                  | (Xie <i>et al.</i> , 2010)                                                                        |
| FLP-1DCAPSR | <i>flp-1</i> dCAPs                       | GAAATCAGAGTTTAAGTATGTATAACCAG                              | (Xie <i>et al.</i> , 2010)                                                                        |
| erdCAPSF    | <i>L. er</i> dCAPs                       | AATGGTAGCCTCTGGGATCTTCTTCA                                 | This study                                                                                        |
| erdCAPSR    | <i>L. er</i> dCAPs                       | ATAAGCTAAACCTTGTGCTGCACCATATG<br>AT                        | This study                                                                                        |
| MYB88-3F    | <i>myb88</i> allele confirmation         | GAGGATAAAAGTAACCAAGAGGTGTTTC                               | (Lai <i>et al.</i> , 2005)                                                                        |
| MYB88-10R   | <i>myb88</i> allele confirmation         | GATATGGCTGCAAACCTATGGAG                                    | (Lai <i>et al.</i> , 2005)                                                                        |
| LBa1        | <i>myb88</i> allele confirmation         | TGGTTCACGTAGTGGGCCATCG                                     | <a href="http://signal.salk.edu/tdnaprimers.2.html">http://signal.salk.edu/tdnaprimers.2.html</a> |
| FLP-7DCAPSF | <i>flp-7</i> dCAPs                       | ACTTACACAGACTTCCATTACATGG                                  | Kind gift of Dr. Eunkyong Lee (University of British Columbia)                                    |
| FLP-7DCAPSR | <i>flp-7</i> dCAPs                       | CCATCTATTACCAAATACTCTTTGAGC                                | Kind gift of Dr. Eunkyong Lee (University of British Columbia)                                    |
| ERGENF      | Confirmation of <i>pER::ER</i> transgene | GGGACAAGTTTGTACAAAAAAGCAGGCT<br>CTTTTGAGAAAAGATAATATTATGTG | This study                                                                                        |
| ERGENR      | Confirmation of <i>pER::ER</i> transgene | GGGGACCACTTTGTACAAGAAAGCTGGGT<br>TTAGAAAACTTAGATAGGCAG     | This study                                                                                        |
| LERPF       | Confirmation of <i>pER::ER</i> transgene | ACTCTTGATTGGGACACACGGCTTAATT                               | This study                                                                                        |
| LERPR       | Confirmation of <i>pER::ER</i> transgene | ATTCCATAACTGTAGACATCGG                                     | This study                                                                                        |

**Xie Z, Lee E, Lucas JR, Morohashi K, Li D, Murray JA, Sack FD, Grotewold E.** 2010. Regulation of cell proliferation in the stomatal lineage by the Arabidopsis MYB FOUR LIPS via direct targeting of core cell cycle genes. *Plant Cell* **22**, 2306-2321.

**Lai LB, Nadeau JA, Lucas J, Lee EK, Nakagawa T, Zhao L, Geisler M, Sack FD.** 2005. The Arabidopsis R2R3 MYB proteins FOUR LIPS and MYB88 restrict divisions late in the stomatal cell lineage. *Plant Cell* **17**, 2754-2767.

**Supplementary Table S3.** Female gametophyte markers used in this study.

| <b>Marker line</b> | <b>Expression pattern</b> | <b>Reference</b>          | <b>Source</b>                                |
|--------------------|---------------------------|---------------------------|----------------------------------------------|
| <i>ET884</i>       | Synergids                 | (Groß-Hardt et al., 2007) | Dr. Ueli Grossniklaus (University of Zurich) |
| <i>ET1119</i>      | Egg cell                  | (Groß-Hardt et al., 2007) | NASC (stock # N26012)                        |
| <i>pMEA::GUS</i>   | Central cell              | (Groß-Hardt et al., 2007) | Dr. Ueli Grossniklaus (University of Zurich) |
| <i>pAGL61::GFP</i> | Central cell              | (Steffen et al., 2008)    | Dr. Gary Drews (University of Utah)          |

**Groß-Hardt R, Kagi C, Baumann N, Moore JM, Baskar R, Gagliano WB, Jurgens G, Grossniklaus U.** 2007. LACHESIS restricts gametic cell fate in the female gametophyte of *Arabidopsis*. *PLoS Biol* **5**, e47.

**Steffen JG, Kang IH, Portereiko MF, Lloyd A, Drews GN.** 2008. AGL61 interacts with AGL80 and is required for central cell development in *Arabidopsis*. *Plant Physiol* **148**, 259-268.

**Table S4.** Stages of floral, ovule and gametophyte development.

| <b>Floral stage<sup>a</sup></b> | <b>Landmarks at beginning of stage</b>           | <b>Ovule stage<sup>b</sup></b> | <b>Ovule landmarks at beginning of stage</b>                                                                                                    | <b>Gametophyte/embryo/endosperm landmarks at beginning of stage</b> |
|---------------------------------|--------------------------------------------------|--------------------------------|-------------------------------------------------------------------------------------------------------------------------------------------------|---------------------------------------------------------------------|
| <b>8</b>                        | Locules appear in medial stamens                 | <b>1-I</b>                     | Ovule buttresses arise                                                                                                                          |                                                                     |
| <b>9</b>                        | Petal primordial become stalked                  | <b>1-II</b>                    | Buttresses enlarge                                                                                                                              |                                                                     |
| <b>10</b>                       | Petal height level with lateral stamens          | <b>2-I</b>                     |                                                                                                                                                 | MMC enlarges                                                        |
|                                 |                                                  | <b>2-II</b>                    | Inner integument initiates                                                                                                                      |                                                                     |
|                                 |                                                  | <b>2-III</b>                   | Outer integument initiates, chalazal nucellus divides                                                                                           |                                                                     |
| <b>11</b>                       | Stigmatic papillae appear                        | <b>2-IV</b>                    | Chalazal nucellus enlarges                                                                                                                      | Meiosis                                                             |
|                                 |                                                  | <b>2-V</b>                     | Integuments extend toward the apex of nucellus                                                                                                  | Tetrad formation                                                    |
| <b>12</b>                       | Petal height level with medial stamens           | <b>3-I</b>                     | Outer integument envelops nucellus and inner integument, funiculus and nucellus curve                                                           | Degenerating tetrad with mono-nuclear embryo sac                    |
|                                 |                                                  | <b>3-II</b>                    | Outer integument surrounds nucellus, micropylar end points more than 90 degrees away from funiculus, further differential growth of integuments | 2 nuclei in embryo sac                                              |
|                                 |                                                  | <b>3-III</b>                   | Micropylar end points away from funiculus about 90 degrees                                                                                      | Vacuole appears in embryo sac                                       |
|                                 |                                                  | <b>3-IV</b>                    | Inner integument surrounds nucellus, endothelium differentiates                                                                                 | 4 nuclei in embryo sac                                              |
|                                 |                                                  | <b>3-V</b>                     |                                                                                                                                                 | 8 nuclei in embryo sac, cellularization                             |
|                                 |                                                  | <b>3-VI</b>                    | Additional cell layer initiated in inner integument                                                                                             | Central cell nuclei fuse, antipodal cells degenerate                |
| <b>13</b>                       | Petals visible above sepals, bud opens, anthesis | <b>4-I</b>                     | Micropyle next to funiculus                                                                                                                     | Fertilization, vacuole in egg cell breaks down                      |
|                                 |                                                  | <b>4-II</b>                    | Additional cell layer in                                                                                                                        | 1st nuclear division in                                             |



|    |                                           |       |                                                            |                                                                                                                              |
|----|-------------------------------------------|-------|------------------------------------------------------------|------------------------------------------------------------------------------------------------------------------------------|
|    |                                           |       | inner integument<br>continues to grow                      | endosperm                                                                                                                    |
| 14 | Medial anthers<br>extend above<br>stigma  | 4-III |                                                            | Migration of one endosperm<br>nucleus to chalazal end                                                                        |
|    |                                           | 4-IV  |                                                            | 2nd nuclear division in<br>endosperm                                                                                         |
|    |                                           | 4-V   | Micropylar end turned<br>back 90 degrees from<br>funiculus | 3 <sup>rd</sup> nuclear division in<br>endosperm, 2 chalazal nuclei<br>reside within cytoplasmic<br>pocket, zygote elongates |
| 15 | Stigma extends<br>above medial<br>anthers | 4-VI  |                                                            | Further nuclear division in<br>endosperm, one-cell embryo<br>proper                                                          |
| 16 | Petals and sepals<br>withering            |       |                                                            |                                                                                                                              |
| 17 | Organ abscission<br>from siliques         |       |                                                            |                                                                                                                              |
| 18 | Siliques turn<br>yellow                   |       |                                                            |                                                                                                                              |
| 19 | Valves of silique<br>separate             |       |                                                            |                                                                                                                              |
| 20 | Seed dispersal                            |       |                                                            |                                                                                                                              |

---

<sup>a</sup>Based on (Smyth *et al.*, 1990); <sup>b</sup>Based on (Schneitz *et al.*, 1995).

**Smyth DR, Bowman JL, Meyerowitz EM.** 1990. Early flower development in *Arabidopsis*. *Plant Cell* **2**, 755-767.

**Schneitz K, Hulskamp M, Pruitt RE.** 1995. Wild type ovule development in *Arabidopsis thaliana*: a light microscope study of cleared whole mount tissue. *Plant J.* **7**, 731-749.
